# Supplementary material for: Dietary Intakes Are Associated with HDL-Cholesterol in Survivors of Childhood Acute Lymphoblastic Leukaemia
Source: MDPI journal article supplement (doi:10.3390/nu11122977), 2019-12-05
Supplement: s1 [file s1]

**Table S1.** Cut-off values for cardiometabolic outcomes

| <b>Risk factor</b>     | <b>Adults</b>                          | <b>Children</b>                                    |
|------------------------|----------------------------------------|----------------------------------------------------|
| <b>BMI</b>             |                                        |                                                    |
| Overweight             | >25 and <30 kg/m <sup>2</sup>          | >85 <sup>th</sup> and <97 <sup>th</sup> percentile |
| Obesity                | ≥30 kg/m <sup>2</sup>                  | ≥97 <sup>th</sup> percentile                       |
| <b>Fasting glucose</b> |                                        |                                                    |
| At risk                | ≥5.6 and <6.1 mmol/L                   | ≥5.6 and <6.1 mmol/L                               |
| Prediabetes            | ≥6.1 mmol/L                            | ≥6.1 mmol/L                                        |
| <b>Triglycerides</b>   |                                        |                                                    |
| Borderline             | ≥1.3 and <1.7 mmol/L                   | ≥1.00 and <1.47 mmol/L                             |
| High                   | ≥1.7 mmol/L                            | ≥1.47 mmol/L                                       |
| <b>LDL-cholesterol</b> |                                        |                                                    |
| Borderline             | ≥2.6 and <3.4 mmol/L                   | ≥2.85 and <3.36 mmol/L                             |
| High                   | ≥3.4 mmol/L                            | ≥3.36 mmol/L                                       |
| <b>HDL-cholesterol</b> |                                        |                                                    |
| Low                    | <1.03 (men) and <1.3 mmol/L<br>(women) | <1.03 mmol/L                                       |

BMI, body mass index; LDL, low-density lipoprotein; HDL, high-density lipoprotein.

**Table S2.** Classification of food groups

| <b>Food groups</b> | <b>Food items</b>                                                                                                                                                                                                                                                                                             |
|--------------------|---------------------------------------------------------------------------------------------------------------------------------------------------------------------------------------------------------------------------------------------------------------------------------------------------------------|
| Meat               | Chicken (grilled, fried, nuggets, casserole, hamburger), Turkey, Beef (grilled, braised, stew, hamburger, veal, pork (grilled, chops), horse meat, lamb, goat, bison, sausage, wiener, cold cut, giblets and meat pâté.                                                                                       |
| Fish and seafood   | White fish, salmon (fresh, canned, smoked), trout, tuna (fresh, canned), fish cake, sardine, mackerel (canned), pollock, lobster, shrimp (fresh, canned), clams, scallops, squid, oysters, mussels, snails.                                                                                                   |
| Dairy              | Milk (skim, 1%, 2%, 3.25%), chocolate milk, cheddar, hard cheese, soft cheese, cream cheese, cottage, ricotta, blue cheese, processed cheese, yogurt (plain, Greek, fruits, drinkable)                                                                                                                        |
| Fat                | Butter, margarine, oil (olive, canola, coco, soya), mayonnaise, cream, lard, bacon.                                                                                                                                                                                                                           |
| Vegetables         | Asparagus, avocado, broccoli, carrots, celery, mushrooms, cabbage, Brussels sprout, cauliflower, cucumber, zucchini, squash, germinated soybeans, spinach, lettuce, arugula, canned or frozen mixed vegetables, corn, turnip, onion, leeks, sweet potato, pepper (sweet, hot), green peas, radish and tomato. |
| Legumes            | Baked beans, soybean, lentils, red beans, white bean, chickpea and lima beans.                                                                                                                                                                                                                                |
| Fruits             | Apricot, pineapple, banana, cherry, lemon, lime, kiwi, strawberries, blueberries, blackberries, raspberries, mango, watermelon, melon, cantaloupe, nectarine, clementine, orange, grapefruit, papaya, peach, pear, apple, prunes, dates, grapes, raisin and canned fruit salad.                               |
| Fast food          | Pizza, hamburger (beef, grilled chicken, fried chicken), gyro sandwich, poutine, hot dog, corndog, club sandwich, hot chicken, chicken wings and fries                                                                                                                                                        |

**Table S3.** Calculation of Estimated Energy Requirement

|                              | <i>Estimate Energy Requirement (EER) [1]</i>                                                                |
|------------------------------|-------------------------------------------------------------------------------------------------------------|
| <b>Age and gender groups</b> | <b>Equations</b>                                                                                            |
| Girl 9-18 years              | $135.3 - (30.8 * \text{age [y]}) + \text{PA} * [(10.0 * \text{weight [kg]}) + (934 * \text{height [m]})]$   |
| Boys 9-18 years              | $88.5 - (61.9 * \text{age [y]}) + \text{PA} * (26.7 * \text{weight [kg]}) + (934 * \text{height [m]}) + 25$ |
| Women $\geq 18$ years        | $354 - (6.91 * \text{age [y]}) + \text{PA} * [(9.36 * \text{weight [kg]}) + (726 * \text{height [m]})]$     |
| Men $\geq 18$ years          | $662 - (9.53 * \text{age [y]}) + \text{PA} * [(15.91 * \text{weight [kg]}) + (539.6 * \text{height [m]})]$  |

|                  | <i>Physical activity coefficients for EER equations [1]</i>                 |                                                                                                           |                                                                                     |                                                                                                                                                                            |
|------------------|-----------------------------------------------------------------------------|-----------------------------------------------------------------------------------------------------------|-------------------------------------------------------------------------------------|----------------------------------------------------------------------------------------------------------------------------------------------------------------------------|
|                  | <b>Sedentary</b>                                                            | <b>Low active</b>                                                                                         | <b>Active</b>                                                                       | <b>Very active</b>                                                                                                                                                         |
|                  | Typical daily living activities (e.g., household tasks, walking to the bus) | Typical daily living activities plus 30-60 minutes of daily moderate activity (e.g., walking at 5-7 km/h) | Typical daily living activities plus at least 60 minutes of daily moderate activity | Typical daily living activities plus at least 60 minutes of daily moderate activity plus an additional 60 minutes of vigorous activity or 120 minutes of moderate activity |
| Boys 3-18 years  | 1.00                                                                        | 1.13                                                                                                      | 1.26                                                                                | 1.42                                                                                                                                                                       |
| Girls 3-18 years | 1.00                                                                        | 1.16                                                                                                      | 1.31                                                                                | 1.56                                                                                                                                                                       |
| Men 19y+         | 1.00                                                                        | 1.11                                                                                                      | 1.25                                                                                | 1.48                                                                                                                                                                       |
| Women 19y+       | 1.00                                                                        | 1.12                                                                                                      | 1.27                                                                                | 1.45                                                                                                                                                                       |

1. Gouvernement of Canada, H.C. Dietary Reference Intakes Tables. Available on line: <https://www.canada.ca/en/health-canada/services/food-nutrition/healthy-eating/dietary-reference-intakes/tables.html> (accessed on September 9, 2019),
